# Supplementary material for: Accuracy of different diagnostic techniques for Schistosoma haematobium to estimate treatment needs in Zimbabwe: Application of a hierarchical Bayesian egg count model
Source: PubMed Central journal article supplement (PMC7462259; doi:10.1371/journal.pntd.0008451), 2020-08-20
Supplement: pntd.0008451.s002.pdf [file pntd.0008451.s002.pdf]

S1: Observed and ‘true’ estimated prevalence of urban districts in Harare, Bulawayo, and Citungwiza of Zimbabwe in a national survey conducted in 2010/2011

| (%)                     | True prevalence    | Questionnaire | Urine filtration | Macrohematuria | Microhematuria |
|-------------------------|--------------------|---------------|------------------|----------------|----------------|
| <b>Harare</b>           |                    |               |                  |                |                |
| Peri-urban              | 25.3 (15.8 - 36.3) | 24.6          | 10.8             | 0.0            | 16.8           |
| Glen View / Mufakose    | 26.3 (18.9 - 36.2) | 18.7          | 13.6             | 0.0            | 12.6           |
| Highfields / Glen Norah | 13.6 (8.8 - 19.8)  | 13.5          | 9.7              | 0.0            | 10.3           |
| Mabelreign / W-Park     | 16.3 (10.6 - 22.7) | 9.7           | 11.5             | 0.0            | 13.4           |
| Mabvuku / Tafara        | 13.2 (1.7 - 26.0)  | 8.8           | 3.3              | 0.0            | 39.6           |
| Mbare / Hatfield        | 15.9 (7.4 - 21.7)  | 14.6          | 5.9              | 0.0            | 12.7           |
| Greystone Park          | 10.4 (0.3 - 35.4)  | 13.0          | 0.0              | 0.0            | 0.0            |
| <b>Bulawayo</b>         |                    |               |                  |                |                |
| Peri-urban              | 2.8 (1.1 - 6.1)    | 6.8           | 1.7              | 0.0            | 1.4            |
| Rogate                  | 5.1 (2.5 - 12.1)   | 4.7           | 3.3              | 0.0            | 2.3            |
| Imbizo                  | 2.2 (0.0 - 8.6)    | 0.0           | 0.0              | 0.0            | 0.0            |
| Khami                   | 5.9 (2.4 - 11.5)   | 3.7           | 4.4              | 0.0            | 0.7            |
| Mzilikazi               | 4.4 (0.6 - 12.1)   | 0.0           | 2.0              | 0.0            | 0.0            |
| Sizinda                 | 14.8 (4.8 - 25.8)  | 4.0           | 12.0             | 4.0            | 8.0            |
| <b>Chitungwiza</b>      |                    |               |                  |                |                |
| Seke-Chitungwiza        | 20.4 (10.8 - 31.9) | 15.6          | 9.0              | 0.0            | 5.7            |
| Zengeza                 | 2.6 (0.0 - 9.4)    | 9.6           | 1.4              | 0.0            | 0.0            |
