# Supplementary material for: Accuracy of different diagnostic techniques for Schistosoma haematobium to estimate treatment needs in Zimbabwe: Application of a hierarchical Bayesian egg count model
Source: PubMed Central journal article supplement (PMC7462259; doi:10.1371/journal.pntd.0008451), 2020-08-20
Supplement: pntd.0008451.s003.pdf [file pntd.0008451.s003.pdf]

S2: Sensitivity and specificity of three hematuria-based diagnostic method for determining the treatment need in a national survey in Zimbabwe conducted in 2010/2011.

|                      | District sensitivity | District specificity |
|----------------------|----------------------|----------------------|
| Questionnaire 17.9%  | 87.5%                | 86.7%                |
| Microhematuria 12.4% | 85.0%                | 86.7%                |
| Macrohematuria 2.6%  | 62.5%                | 76.7%                |
| Questionnaire 10%    | 95.0%                | 63.3%                |
| Microhematuria 10%   | 95.0%                | 70.0%                |
| Macrohematuria 10%   | 20.0%                | 96.7%                |
